# Supplementary material for: “In your face”: The transition from physical to symbolic violence among NBA players
Source: PLoS One. 2022 May 18;17(5):e0266875. doi: 10.1371/journal.pone.0266875 (PMC9116670; doi:10.1371/journal.pone.0266875)
Supplement: S2 File — (XLSX) [file pone.0266875.s002.xlsx]

## Sheet: Sheet1
Physical Violence	Neutral Description	Judgmental	P.V. Encouragement	P.V. Condemnation	Educational	No Comment	Unclear
	“According to the rules, that’s a clean play”	“That’s a flop. See, you have to know the guys who flop at this league. And if there is any bit of doubt, you see how he grabs him and falling down.	“Giving an elbow after the play. I’m glad Karl Malone and Utah finally getting mad”	“The officials are really taking charge here in the third quarter.	“The definition of a flagrant foul is unnecessary contact, has nothing to do with going to the head or going for the ball”	n=8	n=8
	“Looks like a foul on the other end. Livingstone against Shumpert”	you got to know who is trying to trick you”	“Gasol committing the foul, knocking down Perkins. That’s the right guy to foul”	Oh yeah, elbow to the face”	“Now remember those two guys got taunting fouls against each other in game two… If you don’t try to play the ball usually that’s an automatic flagrant foul”
	“Keep your eye on Dennis Rodman, he just grabbed him. Not a whole lot there, he just grabbed him by the waist”		“Malone in between two red shirts and now he and Rodman are tangled up, and it’s Malone’s turn to laugh”	“They’re going to call a double foul. Both guys were grabbing each other, I think it was an excellent call (by the referees)”	“Ron Harper is a great sport in the series... he is a competitive guy and he doesn’t want to hurt him”
	“Elbow to the head by Pippen to Stockton. Stockton came and said something to the officials, and he got his technical foul”		“I love what I’m seeing, the battle between those two guys”	“He hits Shak in the back of his head, and easy play to call”
	“Rodman and Malone were tangled, and it’s number one to Dennis. Dennis grabbed him by the waist”		“Lindsey Hunter was caught, that’s why he has a smirk on his face. Veterans have all the tricks”	“Offensive foul! Good call. You see the elbow... right on his jaw that’s an easy call”
	“Malone and Rodman battling under the board…they both kick each other a little bit”		“You know if I am the Lakers, I don’t separate...I would have pushed them into Wallace and not separated, because that’s a great trade”	“I just would like to see it (a call), been a little difficult to get that charge call”
	“And a foul is called... Lakers often exceed their foul limit and it looks like Harris is going to the line”		“Good foul, you know, instead of letting the guy get a dunk, you grab him and you take the bucket away. Little plays like this can save games”	“That was over aggressive and that’s his second foul”
	“A hard foul! … O’Neil is upset, they are trying to hold him down”		“I am surprised we don’t see more of this”	“Offensive foul, makes him look bad”
	“Foul on Wade on the floor... It looks like he doesn’t understand the call”		“When he is getting into the pain good things eventually happen”	“He should be going to the line for two”
	“A foul is called. It’s on Tyro Hill! It’s his second”		“Parker goes down hard… I think it’s a normal basketball motion”	“Offensive-foul... that’s a good call”
	“And that foul is on Graver, his fourth”		“That’s actually a great call, Lamar Odom as he was falling down… if I am not going to get it you guys are coming down with me”	“Fortunately, Byron Scott quickly calls a timeout to put things back in control”
	“Petty Millers has picked up this offensive foul”		“Some pushing and shoving, it seems during the finals they avoid giving double technical, letting the guys show their emotions which has been a good thing”
	“A hard foul”		“If you are going to create contact, make sure it’s a good foul”
	“Miller along the base line, he goes tumbling into the role of photographers”		“That’s what happens in the playoff series… they wrestle around over there for it…”
	“Rose held the ball away from him, and you’ll see right here, the foul was called…”
	“Kobe got dragged”
	“Lakers are down and now Shaq is on the bench for the rest of the half”
	“Hamilton was definitely hit in the face by Payton, watch the arm”
Symbolic Violence	Neutral Description	S.V. Encouragement	S.V. Condemnation	No Comment	Unclear
	“Plenty of contact there”	“Tristan Thompson, the beast on the board once again”	“The referees need to get in between these two guys, again things are getting real creepy here”	n=15	n=3
	“Draymond Green gets overly aggressive, as he bumps up in Smith”	“Bryant did what he had to...”	“Another technical to either one of those guys and they are thrown out so that’s good officiating... you don’t want something to happen…”
	“Personal Foul”
	“He is very, very upset, he thought he is going to have a foul... no whistle there”
	“Allen Iverson just got one of his six”
	“Iverson is very upset and is actually walking down the court just to get away from the officials”
	“James is in the follow up”
	“And a foul on Draymond Green. Green walking away from the officials”
